# Supplementary material
Source: PubMed Central journal article supplement (PMC4896679)
Supplement: pnas.1603146113.sfig02.pdf [file pnas.1603146113.sfig02.pdf]

Nβ1
Nα1

→
00000
000.00

1
10
20
30

```

Rt_WbbB      . . . . . M . . . . . LAVFLPPYPFRGLKAPYLWMFY . . . . . KYL.HCA.TDS..
Kp_WbbB      . . . . . M . . . . . FAVFLPPYPFRGVKAPYLWLF . . . . . KYL.HCS.NEK..
Sm_WbbK      . . . . . M . . . . . ISIFLPAYPFRGVKAPYLWFFY . . . . . RVL.SSM.KDP..
Ah_WbbB      . . . . . M . . . . . LAAFLPPYPFRAQAAPYLWCYY . . . . . RLLCEWA.DES..
Ec_Orf3      . . . . . M . . . . . KILFYLEIHP . . IRNSYSSF . . . . . TWV.GKQII
SM_b20824    . . . . . . . . . . . . . . . . . . . . . . . . . . . . . . . . . . . . .
Ec_Orf2      P . . . . . . . . . . . . . . . . . . . . . . . . . . . . . . . . . . . . .
Pa_WpaF      . . . . . M . . . . . KKILTISYY . . . . . ADFSRRFFE . . . . . VAL.DPI.LDKKC
Sf_Cps10C    . . . . . M . . . . . KVLIQCGDLL.ENQRRILPL . . . . . A.ESL.RASGA
Sf_28220     . . . . . M . . . . . KVLIQCGDLL.ENQRRILPL . . . . . A.ESL.RAAGA
Ap_Cps10C    . . . . . M . . . . . KVLQCGDHF.ENQSRV.FL . . . . . LA.KE.LKQLGV
Nm_CseA      . . . . . M . . . . . KIALITQNIK . . DPINFSSHFL . . . . . NNL.SLI.IKEKF
Cs_WepM      . . . . . M . . . . . IFLFIIHD . . . . . GLRREMFK . . . . . SLY.EKA.QANGI
Bo_2445      . . . . . M . . . . . IVV . . . . . VVDSMERYIFA . . . . . ARL.VK.AVRKEF
Ap_Cps5B     . . . . . M . . . . . SISILVPSLHINKRNFSSFF . . . . . SWI.EKNKI
Sm_Rkpz1     . . . . . M . . . . . . . . . . . . . . . . . . . . . . . . . . . . . . . .
Sm_Rkpz2     . . . . . . . . . . . . . . . . . . . . . . . . . . . . . . . . . . . . .
Sm_RkpZ      . . . . . . . . . . . . . . . . . . . . . . . . . . . . . . . . . . . . .
Ec_KpsC-N    . . . . . . . . . . . . . . . . . . . . . . . . . . . . . . . . . . . . .
Cs_KpsC-N    . . . . . . . . . . . . . . . . . . . . . . . . . . . . . . . . . . . . .
Nm_KpsC-N    . . . . . M . . . . . F . . . . . . . . . . . . . . . . . . . . . . . . .
Hi_KpsC-N    . . . . . . . . . . . . . . . . . . . . . . . . . . . . . . . . . . . . .
Cj_KpsC-N    . . . . . . . . . . . . . . . . . . . . . . . . . . . . . . . . . . . . .
Ec_KpsC-C    . . . . . . . . . . . . . . . . . . . . . . . . . . . . . . . . . . . . .
Cs_KpsC-C    . . . . . . . . . . . . . . . . . . . . . . . . . . . . . . . . . . . . .
Nm_KpsC-C    . . . . . . . . . . . . . . . . . . . . . . . . . . . . . . . . . . . . .
Hi_KpsC-C    . . . . . . . . . . . . . . . . . . . . . . . . . . . . . . . . . . . . .
Cj_KpsC-C    . . . . . . . . . . . . . . . . . . . . . . . . . . . . . . . . . . . . .
Ec_KpsS      . . . . . MQGNAL . . . . . TVLLSGKKYL.LLQGPMPFFN . . . . . DVA.EW.LESLGR
Cs_KpsS      . . . . . MNHSAL . . . . . DTLISGQKYL.LLQGPMPFFR . . . . . DLG.NW.LETKGR
Nm_KpsS      MKQTVLKNLQ . . . . . NLLSAENIL.LLQGPVGDFFL . . . . . RLA.DW.LTANGK
Hi_KpsS      . . . . . MNHYLD . . . . . ELVQSSQIRL.LLQGPIGHFFA . . . . . DLS.DW.LVGGQK
Cj_KpsS      M . . . . . RFNTKI . . . . . KKEFSGKNVL.LLQGPVGNFFH . . . . . HLA.IRM.EKKQT
  
```

Nβ2
Nα2a
Nα2b

→
000
00000
0000000

40
50
60

```

Rt_WbbB      . . . . . ILFITGEDY . . . . . LSVTDDEAQR . . . . . ARWEFDPASMASLG
Kp_WbbB      . . . . . ILFITSPDY . . . . . VEVINDETQH . . . . . SRWEFDAASMASLG
Sm_WbbK      . . . . . VYFMMGNDY . . . . . LSPLELWERE . . . . . RRWELEDDSQKRLG
Ah_WbbB      . . . . . AFFITGRDY . . . . . VRAPSDWE . . . . . GRWECDQAVQSRIG
Ec_Orf3      NMLR . . . . . . . . . . . . . . . . . . . . . . . . . . . . . . . . . . . . .
SM_b20824    . . . . . . . . . . . . . . . . . . . . . . . . . . . . . . . . . . . . .
Ec_Orf2      RVA . . . . . . . . . . . . . . . . . . . . . . . . . . . . . . . . . . . . .
Pa_WpaF      TWIN . . . . . LCIYPSSY . . . . . IYSRIHKHDCVF . . . . . LPQSVNNYVG
Sf_Cps10C    DPIILHYKPSVGAFKARGIR . . . . . ILHLDDYR . . . . . ARMKKGEVSKAAIG
Sf_28220     DPIILHYKPSVGAFKARGVK . . . . . ILHLDAYR . . . . . ARIKKEVSKAALG
Ap_Cps10C    EPVILMYKEKQGNLFLSNSIK . . . . . VVYLSSYL . . . . . SKVKSLKQDIDFST
Nm_CseA      NI . . . . . FLFTDTDK . . . . . PLLTNYNTKQYNFISPRIKRSNHINLSVTDVN
Cs_WepM      KS . . . . . YIICFSIREY . . . . . FWFLTkgFD . . . . . . . . . . . . . . . . . . . .
Bo_2445      D . . . . . FLFATSEP . . . . . VAHLMALGAGFRS . . . . . VYLRRGAPPSAARDAAG
Ap_Cps5B     N . . . . . IHFENNNK . . . . . DWISLYGFYD . . . . . . . . . . . . . . . . . . . .
Sm_Rkpz1     VT . . . . . . . . . . . . . . . . . . . . . . . . . . . . . . . . . . . . .
Sm_Rkpz2     . . . . . . . . . . . . . . . . . . . . . . . . . . . . . . . . . . . . .
Sm_RkpZ      TSLSF . . . . . PGYEAFAFHGEAWQAAGEQKPIILMFGVHP . . . . . . . . . . . . . . . .
Ec_KpsC-N    . . . . . . . . . . . . . . . . . . . . . . . . . . . . . . . . . . . . .
Cs_KpsC-N    . . . . . MKNS . . . . . VTGIFSKGI . . . . . . . . . . . . . . . . . . . .
Nm_KpsC-N    RK . . . . . RIVKN . . . . . AYIPSRGI . . . . . . . . . . . . . . . . . . . .
Hi_KpsC-N    . . . . . MPT . . . . . ALIFSHGI . . . . . . . . . . . . . . . . . . . .
Cj_KpsC-N    . . . . . . . . . . . . . . . . . . . . . . . . . . . . . . . . . . . . .
Ec_KpsC-C    HL . . . . . QQRNGY . . . . . LWAPGLTL . . . . . . . . . . . . . . . . . . . .
Cs_KpsC-C    HH . . . . . LALRGT . . . . . LWVPLTL . . . . . . . . . . . . . . . . . . . .
Nm_KpsC-C    KN . . . . . DKLRGE . . . . . LYCVGMSL . . . . . . . . . . . . . . . . . . . .
Hi_KpsC-C    LN . . . . . LCLQGN . . . . . LYCVGMSL . . . . . . . . . . . . . . . . . . . .
Cj_KpsC-C    IE . . . . . KANSNR . . . . . LFMLGFTL . . . . . . . . . . . . . . . . . . . .
Ec_KpsS      NAVN . . . . . VVFNGGDR . . . . . FY . . . . . . . . . . . . . . . . . . . .
Cs_KpsS      EAKQ . . . . . VVFNGGDW . . . . . FY . . . . . . . . . . . . . . . . . . . .
Nm_KpsS      TVHK . . . . . FNFNAGDD . . . . . YFYP . . . . . . . . . . . . . . . . . . . .
Hi_KpsS      TVYK . . . . . INFNGGDE . . . . . HFYP . . . . . . . . . . . . . . . . . . . .
Cj_KpsS      KVFK . . . . . LNFNGGDF . . . . . FFYPSGTR . . . . . . . . . . . . . . . . . . . .
  
```

N2αc

○○○○○○

70

|           |                                              |
|-----------|----------------------------------------------|
| Rt_WbbB   | YELPN.....AQSMAC.....                        |
| Kp_WbbB   | YSLPD.....EQSLAR.....                        |
| Sm_WbbK   | FQLPDL.....DQLSAK.....                       |
| Ah_WbbB   | YSLPV.....NAMPEQ.....                        |
| Ec_Orf3   | .....AK.....IDYDDIRIVVSRHYQELI.....DNNQDLKTI |
| SM_b20824 | .....AK.....                                 |
| Ec_Orf2   | .....AK.....                                 |
| Pa_WpaF   | EKKELDELE.....LKKLSK.....YHGDSKKII           |
| Sf_Cps10C | TAFWDEKKYSIYN.....IK.....HELLRALPVDRRRDL     |
| Sf_28220  | DAFWNDEAYSIG.....IK.....HELLRAAPADRRRD       |
| Ap_Cps10C | KIYNDLKIIDFINIE.....VK.....RRPRIGWPSQVKKTS   |
| Nm_CseA   | N.....IK.....KQINVIYKKLGRKHNI                |
| Cs_WepM   | .....SK.....TISLIQYSDSD.....                 |
| Bo_2445   | AIRFDASIEVLNG.QMTTELA.....                   |
| Ap_Cps5B  | .....SKLGIYKIDILTKIEEEELFAFCVYDLNIFNICRAELL  |
| Sm_Rkpz1  | .....WK.....                                 |
| Sm_Rkpz2  | .....WK.....                                 |
| Sm_RkpZ   | .....WK.....                                 |
| Ec_KpsC-N | .....WR.....                                 |
| Cs_KpsC-N | .....WR.....                                 |
| Nm_KpsC-N | .....RK.....                                 |
| Hi_KpsC-N | .....KK.....                                 |
| Cj_KpsC-N | .....WK.....                                 |
| Ec_KpsC-C | .....WK.....                                 |
| Cs_KpsC-C | .....WK.....                                 |
| Nm_KpsC-C | .....WK.....                                 |
| Hi_KpsC-C | .....WK.....                                 |
| Cj_KpsC-C | .....WK.....                                 |
| Ec_KpsS   | .....CR.....HRQYLAY                          |
| Cs_KpsS   | .....RR.....KGKSLSY                          |
| Nm_KpsS   | .....PT.....QAHTVVF                          |
| Hi_KpsS   | .....LS.....IENTIAY                          |
| Cj_KpsS   | .....CK.....                                 |

Nβ3

→ 80

Nα3a

○○○○○○○○○○

90

Nα3b

○○○○○○○○○○○○

100

○○

110

Nα3

○○○○○○○○○○○○

120

|           |                                                              |
|-----------|--------------------------------------------------------------|
| Rt_WbbB   | .....HEYLTLDNAFYETLLSRHHH...DPIKSFSFAFLTERIPD.....LETELHALLD |
| Kp_WbbB   | .....HEYLYLDHALYEIMLAQHHH...DPIKSFTTFLTESISE.....LENELFSL    |
| Sm_WbbK   | .....HKVSVIDESFFSHYMGKCFN...NPDVLFKTFITEVIPE.....LETALFAALS  |
| Ah_WbbB   | .....HHYAWLDENRFDDWLNKLN...NPIEAFRRFLCERDAA.....FERELEALLD   |
| Ec_Orf3   | FL.....GLTKEENDRLSIFYMRDWSDVQAINNWTSLMQGTGEVS...EFYKSILDRIY  |
| SM_b20824 | .....LSIFNPYMKSHA.....                                       |
| Ec_Orf2   | .....DTEFKDENVFLDFIKK.....                                   |
| Pa_WpaF   | .....DKTQKYSYDNLLDK.....                                     |
| Sf_Cps10C | .....YMLRRDGLALTRLVDD.....                                   |
| Sf_28220  | .....YMLRRDGLALTRLVDD.....                                   |
| Ap_Cps10C | .....QQVYKIIAINNILGD.....                                    |
| Nm_CseA   | .....WTLVTDYIDISEFYRK.....NFIE.....                          |
| Cs_WepM   | .....DIIDDLESTIDV.....AAGFINIKSASK.....IYHSTYKSLNK           |
| Bo_2445   | .....ADAAAIVAAMSGVFR.....                                    |
| Ap_Cps5B  | SLVATRPEWYNEDYPNNLREIYKLY...T.NNRSELLQNMAAAWVWDFWKKRLSEL     |
| Sm_Rkpz1  | .....REPFERYFPN.....RRFHFLPMNVGVR...EFERVWRPRIL              |
| Sm_Rkpz2  | .....TFIRDWFDP.....HEPRFVRLKQWPF...EYELYWKRLLL               |
| Sm_RkpZ   | .....RDVLRAYFSD...FRVAYVRTNTSWT...KVQ...TSFC                 |
| Ec_KpsC-N | .....IPHLEKFLAQ.....PCQKLSLLR.....P                          |
| Cs_KpsC-N | .....IAGLHLLPM...PCRKLAPRR.....A                             |
| Nm_KpsC-N | .....IPHLLSTLLPE.....FH                                      |
| Hi_KpsC-N | .....IPHLLASFFPN...QKLAFARI.....FS                           |
| Cj_KpsC-N | .....KLITNVKNFYTI.....FLYKKNLK                               |
| Ec_KpsC-C | .....SAILKPFRLT...PTNRLSFSR.....R                            |
| Cs_KpsC-C | .....RSVVKPFLLST...PYNRLRFTR.....R                           |
| Nm_KpsC-C | .....RAVAKPFFNV...PSCRLKFISSQKL...AGVK                       |
| Hi_KpsC-C | .....RAVIKPFRL...PSCRLHFVKDVSKL...NGKT                       |
| Cj_KpsC-C | .....RHFVKPFKA...KNEIIFLNSIKSL...VRYK                        |
| Ec_KpsS   | .....YQTPKEFPGLRDLHRQ.....                                   |
| Cs_KpsS   | .....QGTPKGFAGWLAATRSA.....                                  |
| Nm_KpsS   | .....NDNYDAFPEFLQEIYITQ.....                                 |
| Hi_KpsS   | .....RGSVSEFYPLYQLFCKQ.....                                  |
| Cj_KpsS   | .....CDEKDLNFYRDFQFS.....                                    |

Nα3c                Nβ4                                Nα4                                Nβ5

Rt\_WbbB    SKKGIIDQIDTFISITC.....NCPSLEHVARTLTK.....EVMHIEI<sup>158</sup>GP<sup>159</sup>LRA.....  
 Kp\_WbbB    .TKEIIRQVD<sup>135</sup>AFV<sup>136</sup>SIC.....NCPSLEKVARALNK.....EVIHLEI<sup>158</sup>GP<sup>159</sup>LRA.....  
 Sm\_WbbK    .QE...SHIECVLTWC.....NCPSLNAAAKRRNI.....KVVNLEL<sup>158</sup>GP<sup>159</sup>LRS.....  
 Ah\_WbbB    .AAP...VDLEAIVTIC.....NVASLEAVCAARGI.....PVIHIEL<sup>158</sup>GP<sup>159</sup>LRG.....  
 Ec\_Orf3    .QNT...FSFDVVVNS.....TNGAIRDFCRERGL.....SNVSMEL<sup>158</sup>GC<sup>159</sup>VRE.....  
 SM\_b20824 .....NQ...DFGFDVLA.....QFKQLVLLARDLGR.....EVIVIER<sup>158</sup>GA<sup>159</sup>L.....  
 Ec\_Orf2    .....NMVRRVLFNSYGNL.....HRLNLVHVCQLNKI.....KTINFD<sup>158</sup>RG<sup>159</sup>L.....  
 Pa\_WpaF    .....EKPDILILSGDSRI...PVITLAIYIAKERKI.....KTIYFEE<sup>158</sup>GPI.....  
 Sf\_Cps10C .....QRI<sup>145</sup>DSLIVWNGVTGH..VANAMRIIGEHKGI.....TGGFLER<sup>158</sup>GY<sup>159</sup>LR.....  
 Sf\_28220 .....QQIDSLIVWNGVTGH..VANAMRIIGNRRKI.....TGGYLER<sup>158</sup>GY<sup>159</sup>LR.....  
 Ap\_Cps10C .....INPDHIVVWNGFTGY..VANILRLVASEKNI.....DSSFIER<sup>158</sup>GL<sup>159</sup>LK.....  
 Nm\_CseA    .....IRPDVLIVWNGITHS..FQTAAVEVAKSFDI.....PVIFLER<sup>158</sup>GLI.....  
 Cs\_WepM    .YE...TESANIYIFGGNGLHSFDKAILKFKNENKHV.....YSVFT<sup>158</sup>ELSNID.....  
 Bo\_2445    .....HLISQCLMWNGQQL..VCRAVAHACAAHGI.....PTKVFME<sup>158</sup>ISNL.....  
 Ap\_Cps5B    .....KQFSHC<sup>145</sup>CVFSGGLI..YQKSLIELLKYTPT.....KVMVME<sup>158</sup>SFTG.....  
 Sm\_Rkpz1    .AEKD....AEFLAWGPE...LPGPLEALARARNI.....PVTFIED<sup>158</sup>GF<sup>159</sup>LRSTRPSAS  
 Sm\_Rkpz2    .RDPR....TRVLAWQYK...GPPKLKEFCARHRI.....PFNYVED<sup>158</sup>GF<sup>159</sup>LRVALGAL  
 Sm\_RkpZ    .QFTP....QAFVFWGMT...EIRAKNYAIKSSI.....PLWRVED<sup>158</sup>GF<sup>159</sup>LRSLDGLGNV  
 Ec\_KpsC-N    .VPQE...VNAI<sup>145</sup>AVWGH<sup>146</sup>RP...SAAKPVAIKAAAGK.....PVIRLED<sup>158</sup>GF<sup>159</sup>VRSLDLGNV  
 Cs\_KpsC-N    .IPDD...VTAI<sup>145</sup>AVWGR<sup>146</sup>RP...SAAA<sup>145</sup>AVARARKAGL.....TVIRLED<sup>158</sup>GF<sup>159</sup>IRSCGPAAH  
 Nm\_KpsC-N    .IYKDG.KGAE<sup>145</sup>AVWG<sup>146</sup>LRP...TTHKARAFATEHQ...PFI<sup>158</sup>ALED<sup>159</sup>GF<sup>160</sup>LRSLGLGVS  
 Hi\_KpsC-N    .VPKA...DSVL<sup>145</sup>GWGL<sup>146</sup>RP...STKKSARAYAQKHN...PFI<sup>158</sup>ALED<sup>159</sup>GF<sup>160</sup>LRSLGLGVD  
 Cj\_KpsC-N    .INKD...DLFF<sup>145</sup>GWGR<sup>146</sup>KK...SGLKAMNLA<sup>145</sup>KKYNT...KFIL<sup>158</sup>LED<sup>159</sup>GF<sup>160</sup>IRSLNLGVE  
 Ec\_KpsC-C    .CTAA...SACV<sup>145</sup>VWGV<sup>146</sup>K...GEQQWRAEAQ<sup>145</sup>RKS...PLWR<sup>158</sup>MED<sup>159</sup>GF<sup>160</sup>LRSSGLGSD  
 Cs\_KpsC-C    .APQA...DACV<sup>145</sup>VWGT<sup>146</sup>A...GEARWOSTTQARGM...P<sup>158</sup>VWRMED<sup>159</sup>DAF<sup>160</sup>IRSVGLGSD  
 Nm\_KpsC-C    .LSD...ARIL<sup>145</sup>AWGN...GKEAIVRFAEQHHI...PLLR<sup>158</sup>MED<sup>159</sup>GF<sup>160</sup>IRSVGLGSD  
 Hi\_KpsC-C    .FTKN...DRL<sup>145</sup>LLW<sup>146</sup>GT...GKEA<sup>145</sup>LN<sup>146</sup>YAKAHNI...NMLR<sup>158</sup>MED<sup>159</sup>GF<sup>160</sup>IRSVGLGSD  
 Cj\_KpsC-C    .LKDD...DKFFI<sup>145</sup>WGRR<sup>146</sup>IDYNV<sup>147</sup>LKTTLIKKAQDENLSHFTPKISLVED<sup>158</sup>GF<sup>159</sup>IRSVGLGSD  
 Ec\_KpsS    .....YDFDTIL<sup>145</sup>CF<sup>146</sup>GDCRP...LHKEAKRWAKSKGI.....RFLAFEE<sup>158</sup>GY<sup>159</sup>LR.....  
 Cs\_KpsS    .....WPFDTIL<sup>145</sup>VF<sup>146</sup>GDCRP...LHQAARRWAQAQGI.....RFLV<sup>158</sup>FEE<sup>159</sup>GY<sup>160</sup>LR.....  
 Nm\_KpsS    .....HHIQAV<sup>145</sup>VF<sup>146</sup>G<sup>147</sup>DTRP...YHVI<sup>145</sup>AKRIANENQ...SFWA<sup>158</sup>FEE<sup>159</sup>GY<sup>160</sup>FR.....  
 Hi\_KpsS    .....HNIDAM<sup>145</sup>VF<sup>146</sup>G<sup>147</sup>DNRK...YHKI<sup>145</sup>AKKISQDRQI.....LFWV<sup>158</sup>LEE<sup>159</sup>GY<sup>160</sup>FR.....  
 Cj\_KpsS    .....KKIDA<sup>145</sup>IL<sup>146</sup>MY<sup>147</sup>NDCRI...IHAKA<sup>145</sup>IKVAKELGI.....EIWI<sup>158</sup>FEE<sup>159</sup>GY<sup>160</sup>LR.....

Nβ5a                                                Hα1

Rt\_WbbB    ...PMYRN<sup>170</sup>TAYLDF...AGV<sup>180</sup>NGGTEASARYEK...CQAEFDI.....  
 Kp\_WbbB    ...PMYRN<sup>170</sup>TAYLDF...TGV<sup>180</sup>NGNTEARARYES...CQTEIDI.....  
 Sm\_WbbK    ...PEYLA<sup>170</sup>TAYLDF...SGV<sup>180</sup>NGNTEAERRY...LSSDYRFN.....  
 Ah\_WbbB    ...PLYRET<sup>170</sup>SYVDF...RGV<sup>180</sup>NGNSESAQRYS...LCHDWQL.....  
 Ec\_Orf3    ...PII<sup>170</sup>N<sup>171</sup>TVCFDA...CGV<sup>180</sup>NGNSVIKNLDFN...AIDEDELI.....DIKT.....  
 SM\_b20824 .....GTI<sup>175</sup>Y<sup>176</sup>DE...DVA<sup>180</sup>YNSPNFSEERFLQE...QFSDDELA.....  
 Ec\_Orf2    ...HTWFFDP...HGF<sup>180</sup>NYSSHSYNNPNNWDL...QITKDERE...SVQEY.....  
 Pa\_WpaF    ...NTTILDS...KGV<sup>180</sup>NANCSFRHSNEI...NNQSKRFE...EAKKTRIKKW...  
 Sf\_Cps10C .....DSVFFDR...DGT<sup>180</sup>NGISSLARGTAT...IYDSADVA.....  
 Sf\_28220 .....DSVFFDR...DGT<sup>180</sup>NGASSLACTAN...IYDSADVS.....  
 Ap\_Cps10C .....DSIFIDV...KGV<sup>180</sup>NGNSTLTDLSDY.....  
 Nm\_CseA    ...RSIFYDF...QGV<sup>180</sup>NAESEIGQOQQOQQESLLTDKDF.....  
 Cs\_WepM    ...GK<sup>175</sup>L<sup>176</sup>FFDS...LGS<sup>180</sup>NASSFFYS...LLKNNEINFKKCNGANINEWKNNY  
 Bo\_2445    ...DK<sup>175</sup>L<sup>176</sup>FVDR...LGV<sup>180</sup>NALSSISRNPV.....  
 Ap\_Cps5B    ...NEY<sup>175</sup>CEERY<sup>176</sup>SSIAN<sup>180</sup>NSDIKHLAIFNSYKKTFSKSEY.....  
 Sm\_Rkpz1    .RTP...LSL<sup>175</sup>ALDG...RAL<sup>180</sup>YFDCRHPDLEV...LLKTYDFE.....  
 Sm\_Rkpz2    .RVP...LSL<sup>175</sup>AFDA...QDM<sup>180</sup>YFNANGPTDLED...ILRTYDFE.....  
 Sm\_RkpZ    .HVL...LSL<sup>175</sup>AVDT...TGI<sup>180</sup>YFDPSRPSTLET...LISEIGVT.....  
 Ec\_KpsC-N    .GEP...LSL<sup>175</sup>VVD...CGI<sup>180</sup>YDASKPSALEK...LVQDKAG.....  
 Cs\_KpsC-N    .GYPT...LSL<sup>175</sup>VIDY...DGI<sup>180</sup>YDASQOSTLEN...LIQDTAG.....  
 Nm\_KpsC-N    .GYP...YSI<sup>175</sup>VYD...IGI<sup>180</sup>YDTHPSRLEQ...LILAADTM.....  
 Hi\_KpsC-N    .GYP...LSM<sup>175</sup>IVDK...LGI<sup>180</sup>YDTRPSTLEQ...LVLAGEC.....  
 Cj\_KpsC-N    .N<sup>175</sup>SPS...FSM<sup>176</sup>VKDD...IGI<sup>180</sup>YDGTMPSTLEN...LLNTYEF.....  
 Ec\_KpsC-C    .LLP...LSL<sup>175</sup>VLDK...RGI<sup>180</sup>YDATRPSDLEV...LLNHSQL.....  
 Cs\_KpsC-C    .LFA...LSL<sup>175</sup>VLDK...RGL<sup>180</sup>YDATRPSDLEI...ALNRVHL.....  
 Nm\_KpsC-C    .LVP...LSL<sup>175</sup>VTD...MSI<sup>180</sup>YFNAETPSRLEY...ILQ<sup>180</sup>QNF.....  
 Hi\_KpsC-C    .LVA...LSL<sup>175</sup>VCD...LGI<sup>180</sup>YFNAESPSRLEE...ILQHQQF.....  
 Cj\_KpsC-C    .LTR...FSL<sup>175</sup>IVDD...KGL<sup>180</sup>YIDPNKASKLEE...LLQNEIF.....  
 Ec\_KpsS    ...P...QFI<sup>175</sup>TVEE...DGV<sup>180</sup>NAYSSLPRDPDF...YRKL<sup>180</sup>PDMP...TPHVEN.....  
 Cs\_KpsS    ...P...CFI<sup>175</sup>TLEE...NGV<sup>180</sup>NGFSSLPREAGF...YMQ<sup>180</sup>LPDTG...QVRINK.....  
 Nm\_KpsS    ...P...YI<sup>175</sup>TLEK...DGV<sup>180</sup>NAFSSLPRRADF...FLEQ<sup>180</sup>PKL...AQQEYKAPT  
 Hi\_KpsS    ...P...DY<sup>175</sup>V<sup>176</sup>TLEK...LGV<sup>180</sup>NAFSSLP<sup>181</sup>RQADF...YLEQAEN...LPEPTVPL  
 Cj\_KpsS    ...P...YCI<sup>175</sup>TLEK...DGV<sup>180</sup>NANSSLP<sup>181</sup>RDKNF...YLSQ<sup>180</sup>NIFT...KESIKE.....

Ha2

0000000.....0

200

|           |                 |       |            |         |                                  |
|-----------|-----------------|-------|------------|---------|----------------------------------|
| Rt_WbbB   | .....KAS        | LGD   | LHNY       | .....FL | .....                            |
| Kp_WbbB   | .....TCS        | MND   | LHRY       | .....FL | .....                            |
| Sm_WbbK   | .....MNVQ       | VEQ   | LREF       | .....FT | .....                            |
| Ah_WbbB   | .....PLT        | TRE   | LLHF       | .....FL | .....                            |
| Ec_Orf3   | .....           | ..... | .....      | IMP     | IKTKHDSLSLFRPINC                 |
| SM_b20824 | .....DSRSYIEE   | LKAG  | DST        | .....LE | .....QMDDYATTR                   |
| Ec_Orf2   | .....           | ..... | .....      | II      | NVLSSNDTLEKNGTRIGAH              |
| Pa_WpaF   | .....TGYKKYR    | LID   | IFYA       | .....FL | SSKNNPEISKYKLP                   |
| Sf_Cps10C | .....NS         | VTA   | LGFVD      | .....ST | LL                               |
| Sf_28220  | .....SS         | VKAL  | LGFVS      | .....ST | LL                               |
| Ap_Cps10C | .....PPANLKL    | AEY   | VDKL       | .....FI | .....QKAISNTS                    |
| Nm_CseA   | .....           | NN    | IRKI       | .....II | .....                            |
| Cs_WepM   | CKSKLNNHNVKQATQ | KRS   | LKNFVHRLSG | II      | EF..ITRLPSYQRFKIDEA              |
| Bo_2445   | .....IDGLPMP    | TED   | AHRR       | .....W  | LA.....RYEQYKARPLPQARTSWKRKA     |
| Ap_Cps5B  | .....DKER       | MKA   | INKE       | .....LL | .....                            |
| Sm_Rkpz1  | .....ADAALMER   | ARAG  | IAL        | .....LT | .....ESGISKYNGARRRAAE            |
| Sm_Rkpz2  | .....SDDALMHR   | ARAT  | TREQ       | .....LL | .....ASRLSKYNSGHSLDIA            |
| Sm_RkpZ   | .....ENATLIER   | ARRC  | MMSM       | .....IS | .....AFGLSKYNVGDVPLK             |
| Ec_KpsC-N | .....NTALISQ    | ARE   | AMHT       | .....IV | .....TGDMSKYNLAPAFVA             |
| Cs_KpsC-N | .....NAALREA    | AQE   | AMRL       | .....IV | .....EGDLAKYNHAPPF               |
| Nm_KpsC-N | .....PSETLA     | QAQ   | TMDF       | .....IL | .....QHHLSKYNHAPELSDDH           |
| Hi_KpsC-N | .....DEVLA      | ..EK  | VRSQ       | .....IM | .....THQLSKYNQT                  |
| Cj_KpsC-N | .....KDEEIKQ    | AKK   | AIEL       | .....IK | .....KYKISKYNNNLDIPDD            |
| Ec_KpsC-C | .....TLAQQMR    | AEK   | LRQR       | .....LV | .....ESKLSKYNLGADFSLP            |
| Cs_KpsC-C | .....TPAEEAR    | AAA   | LRQR       | .....II | .....ESRVSKYNAGGAWRLP            |
| Nm_KpsC-C | .....DDQDFQT    | ALK   | LQKM       | .....LT | .....ENHISKYNVGSDD               |
| Hi_KpsC-C | .....TEADLIE    | ASQ   | LQHA       | .....LV | .....SQHIGKYNVGEET               |
| Cj_KpsC-C | .....DENMLNR    | AKN   | I IKI      | .....LL | .....ENRFSKYNGLKHENLK            |
| Ec_KpsS   | .....LKPSTMKR   | IGH   | AMWY       | .....Y  | LMGWHYRHEFPYRHHKSFSPWYEARCWVRAY  |
| Cs_KpsS   | .....IVPSFWIR   | ARHT  | CIY        | .....C  | IMTWAYHRSYLNYNHKKLSLRKEAYCWIKAG  |
| Nm_KpsS   | .....PVHGGFTPM  | AKN   | AIRY       | .....Y  | IELFRNPRKYPDIHHRAPNAGHYLKPWSLSI  |
| Hi_KpsS   | .....KLAKGFLTM  | AKV   | AIAIY      | .....Y  | VSAYLARDNYPKYQHHRINLKYIKHWIISG   |
| Cj_KpsS   | .....IPGGFKFM   | AFD   | AFLY       | .....W  | LF AFILAPFFNKNLHRTLYP.FEFLWFWRSL |

β1

α1a

210 220 230

|           |                                                  |        |       |   |   |   |   |   |   |   |   |   |
|-----------|--------------------------------------------------|--------|-------|---|---|---|---|---|---|---|---|---|
| Rt_WbbB   | .....EVLPPAEAATHSA                               | A      | G     | V | L | Q | V | E | D | S | N |   |
| Kp_WbbB   | .....EAISLPSSSENQV                               | A      | G     | I | V | L | Q | V | E | D | S | N |
| Sm_WbbK   | .....GQPLVMPQG                                   | .....  | D     | E | D | R | A | E | D | K | F | D |
| Ah_WbbB   | .....THP                                         | .....  | E     | T | C | Q | S | L | P | A | Q | T |
| Ec_Orf3   | .....                                            | .....  | S     | A | S | D | V | L | Y | S | S | F |
| SM_b20824 | .....                                            | .....  | R     | K | L | A | A | L | A | S | L | K |
| Ec_Orf2   | .....                                            | .....  | N     | F | K | T | K | Y | N | I | L | N |
| Pa_WpaF   | .....IQQKIS                                      | .....  | R     | T | P | A | P | R | N | T | S | Y |
| Sf_Cps10C | .....                                            | .....  | S     | F | A | D | T | P | A | S | G | R |
| Sf_28220  | .....                                            | .....  | N     | F | A | D | T | P | A | S | G | R |
| Ap_Cps10C | .....                                            | .....  | D     | K | S | L | L | P | E | N | I | K |
| Nm_CseA   | .....ETGGGLVAEKV                                 | .....  | T     | R | S | T | L | L | K | Q | N | Y |
| Cs_WepM   | .....LYTKKKVMKKLY                                | .....M | ..... | D | E | W | N | P | Y | K | D | N |
| Bo_2445   | MSAVNYALKLATRGVARKRLNTVRATNGAIAPAQAKALTVKALSALRY | V      | L     | F | L | P | L | Q | V | S | G | T |
| Ap_Cps5B  | .....MKNKNVQQPT                                  | .....  | D     | S | E | I | L | V | F | K | Q | P |
| Sm_Rkpz1  | .....                                            | .....  | E     | V | Y | G | E | K | T | R | K | R |
| Sm_Rkpz2  | .....                                            | .....  | S     | I | Y | G | K | T | G | K | R | V |
| Sm_RkpZ   | .....                                            | .....  | R     | L | P | S | D | R | R | R | V | L |
| Ec_KpsC-N | .....                                            | .....  | D     | E | S | E | R | T | N | I | V | L |
| Cs_KpsC-N | .....                                            | .....  | D     | G | S | P | D | A | R | A | V | L |
| Nm_KpsC-N | .....                                            | .....  | P     | L | R | S | P | S | K | P | E | T |
| Hi_KpsC-N | .....                                            | .....  | L     | V | D | Y | E | K | E | G | D | E |
| Cj_KpsC-N | .....                                            | .....  | Y     | F | Q | K | D | E | K | R | V | L |
| Ec_KpsC-C | .....                                            | .....  | A     | K | A | K | D | K | K | V | I | L |
| Cs_KpsC-C | .....                                            | .....  | A     | S | A | W | G | R | R | I | L | V |
| Nm_KpsC-C | .....                                            | .....  | F     | T | A | P | S | T | D | K | T | V |
| Hi_KpsC-C | .....                                            | .....  | F     | S | L | P | N | T | V | K | K | I |
| Cj_KpsC-C | .....                                            | .....  | I     | N | A | K | I | G | Q | K | V | I |
| Ec_KpsS   | WRKQLY..KVTQRKVLPR                               | .....  | M     | N | E | L | D | Q | R | Y | L | A |
| Cs_KpsS   | WLKIWY..KLTESRNKKI                               | .....  | K     | S | E | L | S | T | K | N | L | V |
| Nm_KpsS   | LKRLNY..YIEDIQIAKRV                              | .....  | E     | A | G | K | Y | K | F | F | I | V |
| Hi_KpsS   | IKRTCY..YLRDRMF                                  | AKKV   | ..... | T | K | G | E | L | G | H | F | I |
| Cj_KpsS   | YRKLY..KITEKLN                                   | EKIY   | ..... | N | L | E | K | K | Y | F | L | A |

Ca1a                      Ca1                      Cβ2

○○○○                      ○○○○○○○○.....○○○                      →

240                      250                      260

```

Rt_WbbB LIAYN...HDFTNISLLSYV...RQR...YEKEDILVRAHPGSL...
Kp_WbbB LIAYS...HNFTNISLISYV...RQQ...HTLENILVRAHPGSL...
Sm_WbbK IIAFS...NSFNNQSLLDYA...EFT...FPGKR.LIRSHPGSR...
Ah_WbbB LVAYG...NGMSNLA LLAAA...RQK...VATQE LLVRAHPGSP...
Ec_Orf3 RIIFS...RFHGMDFLREI...IPQLLDAGYTCIVKPHPMANASAAREVNKKDHFQ
SM_b20824 VTMFIKGEQQYPEFSA SLSET...IDA...NPDIVFVVKPHPLSKLDH...
Ec_Orf2 IRHFS...DEIRSVQNF LNNV...VTL.AKSIKDKGWVIVVQHPLEESTE...
Pa_WpaF MILHS...PYFKDHTIVKAV...YNALKLS...LPEHNLIVRHPPLYIGKYEKP...
Sf_Cps10C ILLYS...PSIKTMRQLVLDL...INLAQAL...GQEWNVIVRDHP EETQSGL...
Sf_28220 ILLYS...PSIKTMRQLVLDL...INLAQAL...GQEWNVIVRDHP EETQSGL...
Ap_Cps10C IIMYC...KYNTMREVFFEI...YSHLNDDVIFVVRHP EEDVETLS...
Nm_CseA MLFNS...PYVKMYSILNGL...NNWCHEN...NNIPKILVRHP EDPNTHYT...
Cs_WepM IKLHS...KIDNEKALYIAC...KEAL.KLKLPLVVKPHPAEPDASVLKKI...
Bo_2445 IKLHS...DVIDNLKAIQLAFEHAA...NESADLIVKHPAECDAVID...
Ap_Cps5B VLEYK...GRGLSTIKIYKEL...ISKLSNGFNVVLKTHP WEEKKNIRTSLTKNI...
Sm_Rkpz1 VRYGC...LARMSNNDLVRLA...NSE...QADAQIFVKPHP DVLSRVRPARSDP...
Sm_Rkpz2 IAYGC...SKKMTNNDLVRLA...SLE...NPAAQIIYKHP EVLKGTAKAKSDP...
Sm_RkpZ IVMGC...AARYTNDIVRIT...QKE...NPEAEVIYRHP DVLGHRKEFSNP...
Ec_KpsC-N VTYGN...AGPHEFAAMLEAA...MAE...NPQAEIWKVHP DVLEGGKQGYFAD...
Cs_KpsC-N VTFGN...ASAASFRLMLESA...LAE...NPDAEIWKVHP DVVHGGKRGYLRD...
Nm_KpsC-N IQYGG...ADASTFELMFQTA...LNE...NPQADIWKVHP DVLSGKKQGYLTD...
Hi_KpsC-N VKYQG...ADAEHFAQMLQAA...ITE...NPKAKILVKTHP DVLSGKKQGYFSPN...
Cj_KpsC-N LEFGF...AKDFKTVMIKDA...IKE...NPDSKIYKHP DVLSGKKQSDLVI...
Ec_KpsC-C IKTGT...VSIKSNLELLRTV...RER...NPHAYIVYKHP DVLVGNRKGDIIPA...
Cs_KpsC-C LVDGT...QGIRTIAALLRMV...RAR...NPQAYIVFKHP DVACGNRQGEPSA...
Nm_KpsC-C IRYGS...PQIYRNLDLLRTV...RER...NPNAVIIYKHP DVVSGNRIGHISP...
Hi_KpsC-C IRTAS...PNIRTNLDLLKTV...CAA...NPQAYIVYKHP DVVSGNRIGHIAE...
Cj_KpsC-C MILGG...FSLSTLDLLKEV...RSK...NQDAYIFKHP DVLSGNRVGLKDE...
Ec_KpsS IRNHS...NYNDVRDYINEVMYSFSRKA...PKESYLVIKHP MDRGHRLYRPLIKR...
Cs_KpsS VTFHS...KYKDIEQYLHEVLFSSFAIYA...PAEQHLVIKHP MDRGHKNYKKQISL...
Nm_KpsS VRIHC...DFPSVRSFLLHVIFSSFAEHA...PADTNIIKHP MDRGFIDYWRDIKR...
Hi_KpsS VKIHC...DFNSVGEFLAEVLRSFATSA...PNHLNLVIKHP MDRGFVHYESVILE...
Cj_KpsS IKYHYK...KSIEHFI EETILSFANHA...RAKSYLVFKHP MDRGYKNYSKLIND...

```

Cβ2a                      Ca3                      Cβ4                      Ca4                      Cβ5

→                      ○○○○○○○○                      →                      ○○○○○○○○○                      →

270                      280                      290                      300                      310

```

Rt_WbbB .....FRLRDDVFTIDD...SANS LAFINQCNEVFTINS SVGLEAILTGKKT TVLGD
Kp_WbbB .....FRLRDDIFSIDA...SANSLEF IQKCHSIY TINS SVGLEALLCEKKT NII LGD
Sm_WbbK .....FTLQEGHDVIDH...SANSIDF IQRCKHILTINS SVGLEAMLLDTPV TVLGD
Ah_WbbB .....FSLKTAEVCLDN...SPNSLCFVALCRQILTINS SVGLEALLLDKPL TVWGD
Ec_Orf3 CQEYVD...KLG LDSVIWLDLKGNNYLSLNLNVNYVVSINS MAFEAMMLG IPTVVMGN
SM_b20824 .....LTQKPNLILAAR...EDNIHCLLDIASFTVCYNSVGLLSILHQPTATLGN
Ec_Orf2 .....IEEKENLIVLKP...TDHFYDAINSSDAVMLINS VGGLYSLMAGKPTYNVGN
Pa_WpaF ...LYD...FITENKDIYLDP...KSNLIELIR SSELV FVNNS TVGLEVMSIGKPL IVLGD
Sf_Cps10C .....NIPFGDRVWRDN...TSTLEERISSSSI VFTVNSTVGLT AALAGKV ICNCE
Sf_28220 .....NIPFGDRVWRDN...SSTLEERISSSHI VFTVNSTVGLT AALAGKV ICSDG
Ap_Cps10C .....NLPNWDNLIVST...DLDLNFVLENSDLIVTINSTVGLEALLKPKV IC LCK
Nm_CseA .....KHMNFENLTIQS...DGALLETIQKANAIMTVNSTVGF TSLILDKV IALGK
Cs_WepM .....LEMKKS NKF F IS...TDNTFSLIKKSKKVI VINSTVGLEAIFCNKEVIFLGD
Bo_2445 .....EVVRMQRVYHFDL.VTSP TDLIKHAHSVVTINSTVGLEALLYGKPV VSLGR
Ap_Cps5B IE EFLKNLTENQQECIKIVD...HYSIKKLFKQSDFI ISLNSQGLLEAALFDG I KPIQLGN
Sm_Rkpz1 .....AEVAHLCELVTD...SLPLAEA LRTVDHVY TITS LAGFEALIRGIPVTTAGC
Sm_Rkpz2 .....ELVRDIALILQQ...DISLADALETIDHVY TITS LAGFEALLRGINVTTAGC
Sm_RkpZ .....RDVANICTILSG...DYDLGSLLDSDVDHVY TITS LAGFEALIRKKVTVF GA
Ec_KpsC-N .....LRATQRVRLIAE...NVSPQSLLRHVSRVYVVT SQYGF EALLAGKPVTCF GQ
Cs_KpsC-N .....IRANTRLRLITE...DASQSLLRCSVRVYTVTS HFGFEALMAGKPVVCF GQ
Nm_KpsC-N .....LAQQPRVRL LAE...DINPISLQAVDKVYCVTS QMGFEALLCGKPLVTFGL
Hi_KpsC-N .....ENYPSNVHFFSD...PVNPISL IKAKEVYCVTS QMGFEALLAGKPVVTFGV
Cj_KpsC-N .....NSLPKECILITE...PNFNIALLEFFDKVYTKTS GMGFEALIQECKCYGV
Ec_KpsC-C .....ELTAE LADYQAL...DADI IQC IQRADVHTMTSLSGFEALLHGKHVHCYGL
Cs_KpsC-C .....RDALRWADCLAT...QADIVDVLDQVDEVHTLTS LAGFEALLRGKTVFCYGM
Nm_KpsC-C .....EDAARYADQTAE...QTDILT LQYADEVHTMTSLTGF EALLRKKVSCYGL
Hi_KpsC-C .....SQAVKLADQIAK...TENVLDCINAVDELHTMTSLAGFEALLRNKTVHCYGL
Cj_KpsC-C .....TLILEFCDEIVK...DCSIDSAIKIADEIHTITS TSGFDALLRAKKVFTYGM
Ec_KpsS ...LSKE.Y.GLSERV IYVH...DLPMP ELLRHAKAVVTINSTAGI SALIHNKPLKVMGN
Cs_KpsS ...LARK.Y.KICKRVHYVH...DLNLP ELIHHRSRVVTINSTVGLS ALIHNKPLKVMGN
Nm_KpsS ...FIKE.HPELKG RVIYVH...DVPLPVFLRHGLGMV TINSTSGLSGLIHNM PVKVLGR
Hi_KpsS ...FESC.YPHLKG RLFYVH...DVPLPVLLRRGKGMV TINSTSGIS ALLHGMPVITLGR
Cj_KpsS ...LSQK.Y.HVEGRVLYVH...DTHLPVLLRKALGCI TINSTVGLSAILLEGCP TKVCGN

```

|           | Ca5                                           | Ha3                    | Ha4             |
|-----------|-----------------------------------------------|------------------------|-----------------|
|           | ○○○○○ ○                                       | ○○○○○○○○○○○○○○○○○○○○ ○ | ○○○             |
|           | 320                                           | 330 340                | 350             |
| Rt_WbbB   | CS.....YAFINELAG.....                         | ASATVNAAAFY            | LFS.....YLVPFDL |
| Kp_WbbB   | CS.....YAFVAEEAS.....                         | GNPNRVNAAFY            | LFA.....YLVPFEL |
| Sm_WbbK   | CS.....YAFCNVANQ.....                         | TEKVKRLAFY             | LFS.....YLVPFEL |
| Ah_WbbB   | NS.....YNFILEAHD.....                         | DAERKRRLSFY            | LFG.....YLVPFSL |
| Ec_Orf3   | APFDIGS YSFEDLLED.KYP.....                    | EELALKNKI              | ITNVIYRNYLVPQSL |
| SM_b20824 | AF.....YNMAGAGYRASSVQDAIDVF.....              | RAGNLTPPPSE            | LIE.RLAAWFIFRRY |
| Ec_Orf2   | AY.....YCHAGLSIKIKNPEDFKKCM.....              | NDLSYPSKD              | KVE.KFIHYLITRFY |
| Pa_WpaF   | SY.....YDNNLYTNK.YYGHDLDRLI.....              | LSSLNDIEKIN            | LAK.KRVNY.....  |
| Sf_Cps10C | GI.....YCRESFVIN.KSNMTRDQLV.DRV..             | RAALQDGPDIE            | ALK.RYMCLLLDRHQ |
| Sf_28220  | GI.....YCGEPFVIN.KTNMMRDQLV.DRV..             | RSALRDGPDSE            | ELT.RYMCLLLDRHQ |
| Ap_Cps10C | SI.....YSSLPCLSKYNHI.....                     | LDDRKILCN              | NVS.GYLGYLITRNL |
| Nm_CseA   | SI.....YNNRELCEPKNMNELY.....                  | ATLNCPNDW              | ILN....SYMREKRK |
| Cs_WepM   | SF.....YKY.....                               |                        |                 |
| Bo_2445   | CF.....YKEFDRT.....                           |                        | RLK             |
| Ap_Cps5B  | AF.....YGKKGFTYD.YDFLDIDQLVNDLVVNKLTPTLSLEEFD |                        | LFE.EFITILLQKHA |
| Sm_Rkpz1  | PF.....YAGWGLTDD.RQT.....                     | NPRRGRQLS              | IEA.....        |
| Sm_Rkpz2  | PF.....YSGWGLTDD.RQP.....                     | NQRRNRKLT              | IDQ.....        |
| Sm_RkpZ   | PF.....YSGWGLTDD.RQP.....                     | TPRRTAKPS              | LDE.....        |
| Ec_KpsC-N | PW.....YASWGLTDD.RHPQSAL.....                 | LSARRGSAT              | LEE.....        |
| Cs_KpsC-N | PW.....YAGWGLTDD.RHPAAAT.....                 | LAARRGNAS              | LTL.....        |
| Nm_KpsC-N | PW.....YAGWGVSDD.RHPKIDSL.....                | VQTQRRAPRN             | LLQ.....        |
| Hi_KpsC-N | PW.....FAGWGVTTD.RHQNAKAL.....                | AQSERRKVRV             | VLQ.....        |
| Cj_KpsC-N | PF.....YAGWGLTKD.KLE.....                     | CKRRMQKRS              | LEE.....        |
| Ec_KpsC-C | PF.....YAGWGLTVD.EHR.....                     | CPRRERKLT              | LAD.....        |
| Cs_KpsC-C | PF.....YAGWGLTHD.EYP.....                     | CPRRTRRLT              | LNA.....        |
| Nm_KpsC-C | PF.....YAGWGLTQD.LLP.....                     | IPRRSRRLE              | LWQ.....        |
| Hi_KpsC-C | PF.....YSHWGLTVD.HCS.....                     | FNRRNRKLS              | LLE.....        |
| Cj_KpsC-C | PF.....YAGWGLTKD.KHK.....                     | CERRTRKLS              | LEE.....        |
| Ec_KpsS   | AL.....YDIKGLTYQ.GHLHQFWQ.....                | ADFKPDMK               | LFK.KFRGY.....  |
| Cs_KpsS   | AF.....YDITGMTYP.KTLDEFWI.....                | DDFIMEQT               | LFK.KFKSY.....  |
| Nm_KpsS   | AY.....YDIPGITDQ.NTLAEFWN.....                | HPTPPDKE               | LFH.AYRMY.....  |
| Hi_KpsS   | AN.....YHFEGLTHQ.GDLASFQ.....                 | NPTKPDMS               | VFE.AYRKY.....  |
| Cj_KpsS   | AF.....YDFEGLSYP.KKLQFFWR.....                | EAHAYKPNV              | LVC.NFKKY.....  |

|           | Ha4                                                    | Ha5             |                 |
|-----------|--------------------------------------------------------|-----------------|-----------------|
|           |                                                        | ○○ ○○○○         |                 |
| Rt_WbbB   | .....VFNQEY                                            | LK.....         |                 |
| Kp_WbbB   | .....IFNLEY                                            | LR.....         |                 |
| Sm_WbbK   | .....LFDINY                                            | IR.....         |                 |
| Ah_WbbB   | .....QLKPAY                                            | LR.....         |                 |
| Ec_Orf3   | AFEYEHFIFHIRRAIRLNKILMNKGASAF.....                     | TKEI IKHDN      | ISYIYESLNTEPLVK |
| SM_b20824 | .....SRFVATDS                                          | IA.EFKERKAHG... |                 |
| Ec_Orf2   | SFGKANYIEIV.....DPKT.....                              | KSKTTNATY       | VD.....         |
| Pa_WpaF   | .....LFNDIF                                            | ITGHFRDL        | LD.....         |
| Sf_Cps10C | LFDTELVLVDAGYSTQALS RFAGDSTTPRTESSLIKRLQQQVSAAYER..... |                 |                 |
| Sf_28220  | LFDSEQFLGAGYSTQALS RFAGHSPSPKAEANLLKRIQQQVRAAHER.....  |                 |                 |
| Ap_Cps10C | IV.....KDSIYNTNV                                       | IKSIFK.....     |                 |
| Nm_CseA   | DF.....VSKVIANS                                        | HS.....         |                 |
| Cs_WepM   | .....FVNDDV                                            | LS.....         |                 |
| Bo_2445   | .....YIHSFL                                            | IDGID.....      |                 |
| Ap_Cps5B  | .....VSIHASG                                           | VS.....         |                 |
| Sm_Rkpz1  | .....LFAGAY                                            | LL.....         |                 |
| Sm_Rkpz2  | .....IFAAAY                                            | IL.....         |                 |
| Sm_RkpZ   | .....LFAAAY                                            | IL.....         |                 |
| Ec_KpsC-N | .....LFAAAY                                            | LR.....         |                 |
| Cs_KpsC-N | .....LFSAAAY                                           | LR.....         |                 |
| Nm_KpsC-N | .....LFAAAY                                            | LQ.....         |                 |
| Hi_KpsC-N | .....LFYAAY                                            | FQ.....         |                 |
| Cj_KpsC-N | .....VFYAAY                                            | IL.....         |                 |
| Ec_KpsC-C | .....LIYQAL                                            | IV.....         |                 |
| Cs_KpsC-C | .....LIHTTL                                            | ID.....         |                 |
| Nm_KpsC-C | .....LIAGTL                                            | IH.....         |                 |
| Hi_KpsC-C | .....LISGTL                                            | IV.....         |                 |
| Cj_KpsC-C | .....LVAGAL                                            | IT.....         |                 |
| Ec_KpsS   | .....LLMKTQ                                            | VNWVY.....      |                 |
| Cs_KpsS   | .....LINKAQ                                            | INAVY.....      |                 |
| Nm_KpsS   | .....HLNVTQ                                            | INGNF.....      |                 |
| Hi_KpsS   | .....HLNKTM                                            | INGSF.....      |                 |
| Cj_KpsS   | .....LLQTNQ                                            | FNGNF.....      |                 |

|           | Hα5                                                         |                                    | Hα6            |
|-----------|-------------------------------------------------------------|------------------------------------|----------------|
|           | ..... <u>00</u>                                             |                                    | <u>000000</u>  |
|           | 360                                                         |                                    | 370            |
| Rt_WbbB   | .....FRLGH.....                                             |                                    | .....PEEREIVG  |
| Kp_WbbB   | .....FRLDH.....                                             |                                    | .....PAELDIVR  |
| Sm_WbbK   | .....FRLSS.....                                             |                                    | .....PDEAEIIT  |
| Ah_WbbB   | .....FRLGQ.....                                             |                                    | .....PEQLDIIL  |
| Ec_Orf3   | KRHLEHYNK.....                                              | .....HVE.QIKKKSTSTTTLAASISNVT      |                |
| SM_b20824 | .....YKD.....                                               | ILVTHFRWNGHDLPLDRQRRFVQFSRRSY..... | .....AWSQMAVT  |
| Ec_Orf2   | .....FENIKIPLDNGIMHEINISRRKEPFKINSVYFDYRSGISLRDEIEIKYKKNISD |                                    |                |
| Pa_WpaF   | .....TSR.....                                               | .....FIK.....                      |                |
| Sf_Cps10C | .....YPK.....                                               | .....GIAVDFQLDRTDTLSLTYRKSAAERVT   |                |
| Sf_28220  | .....YPE.....                                               | .....GIAVDFQLSRTDTLSLTYRKSAAERVT   |                |
| Ap_Cps10C | .....FNDKL.GESNFIIDTL..SKKDIPF..CKVFLDFSLSK..LNLTYRKNSEVIT  |                                    |                |
| Nm_CseA   | .....FQH.....                                               | .....NIFLDIQLLA.....               |                |
| Cs_WepM   | .....Y.....                                                 | .....YINEWLVDIDIFE..               | .....PSVITDTE  |
| Bo_2445   | .....                                                       | .....YFG.....                      | .....TGEIAPRA  |
| Ap_Cps5B  | .....LSR.....                                               | .....IFNL..PTIIPLVENVPKEKSKTT      |                |
| Sm_Rkpz1  | .....YPR.....                                               | .....YFD.....                      | .....PETGAQTS  |
| Sm_Rkpz2  | .....YPR.....                                               | .....YLD.....                      | .....PVTKAPIE  |
| Sm_RkpZ   | .....YPR.....                                               | .....YCV.....                      | .....GSLGSSAE  |
| Ec_KpsC-N | .....YCR.....                                               | .....YID.....                      | .....P.....    |
| Cs_KpsC-N | .....YAR.....                                               | .....YLN.....                      | .....P.....    |
| Nm_KpsC-N | .....YSR.....                                               | .....YLN.....                      | .....P.....    |
| Hi_KpsC-N | .....YTR.....                                               | .....YLN.....                      | .....P.....    |
| Cj_KpsC-N | .....YAE.....                                               | .....YFN.....                      | .....P.....    |
| Ec_KpsC-C | .....YPT.....                                               | .....YIH.....                      | .....PTRLQPIT  |
| Cs_KpsC-C | .....YPF.....                                               | .....YRH.....                      | .....PTRKTPIA  |
| Nm_KpsC-C | .....YPD.....                                               | .....YIH.....                      | .....PETHQAIN  |
| Hi_KpsC-C | .....YPO.....                                               | .....YVN.....                      | .....PNTGELTN  |
| Cj_KpsC-C | .....YPR.....                                               | .....YIN.....                      | .....PKTKTLCE  |
| Ec_KpsS   | .....YGG.....                                               | .....NTT.....                      |                |
| Cs_KpsS   | .....YCK.....                                               | .....DLS.....                      | .....WKEMLSLG  |
| Nm_KpsS   | .....YSQ.....                                               | .....VFF.....                      | .....PNKKTSENS |
| Hi_KpsS   | .....YTR.....                                               | .....VIL.....                      | .....PLHQDEN.  |
| Cj_KpsS   | .....YKN.....                                               |                                    |                |

|           | Hα6                              |                                             |                        |
|-----------|----------------------------------|---------------------------------------------|------------------------|
|           |                                  |                                             | ..... <u>000000</u>    |
|           |                                  |                                             | 380                    |
| Rt_WbbB   | .....                            | .....KHIEFY SADMPG.....                     |                        |
| Kp_WbbB   | .....                            | .....KHLQFYS.KMPD.....                      |                        |
| Sm_WbbK   | .....                            | .....KHNYYITCGDGM.....                      |                        |
| Ah_WbbB   | .....                            | .....CHVSEYM.....                           |                        |
| Ec_Orf3   | PELIMSTVT.....                   | .....PSPSA.....                             | .....GELVI             |
| SM_b20824 | VKGTTKHS.....                    | .....SSFYE.....                             | .....W..AFLIT.....     |
| Ec_Orf2   | LNSLINKLKT..NRTTKIIIEEDTSSN..... |                                             | .....KDTHT             |
| Pa_WpaF   | ...ISEI IKNE.....                |                                             |                        |
| Sf_Cps10C | ASWVMQALE.....                   | .....KNF.....                               | .....PGITFRRSLPDEPVNPA |
| Sf_28220  | ANWVMQALE.....                   | .....KNF.....                               | .....PGIAFRRSLPDEPVNPA |
| Ap_Cps10C | LEWIEKILL.....                   | .....SYFKD.....                             | .....KEISYVRNIDDA..... |
| Nm_CseA   | .....                            |                                             |                        |
| Cs_WepM   | FRKIINI AK.....                  |                                             |                        |
| Bo_2445   | ARSVFSMKH.....                   |                                             |                        |
| Ap_Cps5B  | LPTQKDVVK.....                   |                                             | .....KENTTIVNMVE.....  |
| Sm_Rkpz1  | FEATVTAIR.....                   | .....RQLDEPQSLGPPRPQWRAGPYGLLGWRHLLTAF..... | .....V                 |
| Sm_Rkpz2  | IEQALEVLA.....                   | .....RMRAEQIAA.....                         |                        |
| Sm_RkpZ   | IEHAIMSLALEKNGVPRELAEGVSS.....   |                                             | .....AL.....           |
| Ec_KpsC-N | .....                            |                                             |                        |
| Cs_KpsC-N | .....                            |                                             |                        |
| Nm_KpsC-N | .....                            |                                             |                        |
| Hi_KpsC-N | .....                            |                                             |                        |
| Cj_KpsC-N | .....                            |                                             |                        |
| Ec_KpsC-C | VEEAAEYLI.....                   | .....QTPRKPM.....                           |                        |
| Cs_KpsC-C | AEEAVALLS.....                   | .....ASPRRVNTH.....                         |                        |
| Nm_KpsC-C | AETAAQILI.....                   | .....RQKNMQKNN.....                         |                        |
| Hi_KpsC-C | AQTAIEILK.....                   | .....AQR.LALNH.....                         |                        |
| Cj_KpsC-C | IEVCLDIML.....                   | .....NLQKDYFSK.....                         | .....KHIKLAIDF.....    |
| Ec_KpsS   | .....                            |                                             |                        |
| Cs_KpsS   | EQEHITR.....                     |                                             |                        |
| Nm_KpsS   | STPVI.....                       |                                             |                        |
| Hi_KpsS   | .....                            |                                             |                        |
| Cj_KpsS   | .....                            |                                             |                        |

Ha7

390 0000000000 400

Rt\_WbbB . . . . SLSQAAHSLSSLINEAIS . . . . .
Kp\_WbbB . . . . EREENSHTLSTLINEAIS . . . . .
Sm\_WbbK . . . . . RDAEMEKASS . . . . .
Ah\_WbbB . . . . . QDHLDPKIFDGLPS . . . . .
Ec\_Orf3 KHPVIKSSFKKKMIKLKNNPKK . . . . . FF . . . . . KDSKKGYI . . . . . RVLSNI
SM\_b20824 PATMPPPPKTSRKRSNGNAQQOI . . . . . YYGM . . . . . PRKLTGV
Ec\_Orf2 TNIVRTGAMQAKLKKLNKHPYL . . . . . FF . . . . . KDAIKN . IGVKTKKIINA
Pa\_WpaF . . . . . IY . . . . .
Sf\_Cps10C SSVVCVCS TNVTTFGKLLHSDYVAVLDQYGEPLRFYD . . . . .
Sf\_28220 SSVVCVCSANIATFGKLLHNGYAAVLDQYGEPLRFYD . . . . .
Ap\_Cps10C . NIVITDK . . . . . FY . SDLKFQDS . . . . . KIYIDI
Nm\_CseA . . . . . LKNKIYS . . . . . KILL . . . . .
Cs\_WepM . . . . . NKHHA . . . . .
Bo\_2445 . . . . .
Ap\_Cps5B PKVVPQSDKNRKYQKFRNNPRQ . . . . . FF . . . . . ADSRNPVI . . . . . RSLMYF
Sm\_Rkpz1 TAAIRKIGSDRDVEDFRADPIR . . . . . FFRS . . . LSDRKYRIIG . . . RILYPF
Sm\_Rkpz2 . . . . .
Sm\_RkpZ AEAINVDCVSTLEGLKSIPS . . . . .
Ec\_KpsC-N . . . . .
Cs\_KpsC-N . . . . .
Nm\_KpsC-N . . . . .
Hi\_KpsC-N . . . . .
Cj\_KpsC-N . . . . .
Ec\_KpsC-C . . FITRKKAGR VIRIYRKLIMFC . . . . . KVRFG . . . . .
Cs\_KpsC-C . . HRRRKTITRLANKARNLFHAL . . . . . FYSR . . . . .
Nm\_KpsC-C . . NGLHRGYFAKKLGKIKQLYRS . . . . . FK . . . . .
Hi\_KpsC-C . . SGIHRHWLAKQYGKLLQHLVCA . . . . . LRT . . . . .
Cj\_KpsC-C . . . . . KTFMFRKIRR . . . . . FYEF . . . LTEK . . . . .
Ec\_KpsS . . . . . NCQHN . . . . . IY . . . . .
Cs\_KpsS . . . . .
Nm\_KpsS . . . . .
Hi\_KpsS . . . . .
Cj\_KpsS . . . . . FF . . . . . LDK . . . . .

Rt\_WbbB . . . . .
Kp\_WbbB . . . . .
Sm\_WbbK . . . . .
Ah\_WbbB . . . . .
Ec\_Orf3 IP . . . . .
SM\_b20824 TAIEI . . . . .
Ec\_Orf2 KGSQIQ . . . . .
Pa\_WpaF . . . . .
Sf\_Cps10C . . . . .
Sf\_28220 . . . . .
Ap\_Cps10C YGVALN . . . . .
Nm\_CseA . . . . .
Cs\_WepM . . . . .
Bo\_2445 . . . . .
Ap\_Cps5B FPYK . . . . .
Sm\_Rkpz1 G . . . . .
Sm\_Rkpz2 . . . . .
Sm\_RkpZ . . . . .
Ec\_KpsC-N . . . . .
Cs\_KpsC-N . . . . .
Nm\_KpsC-N . . . . .
Hi\_KpsC-N . . . . .
Cj\_KpsC-N . . . . .
Ec\_KpsC-C . . . . .
Cs\_KpsC-C . . . . .
Nm\_KpsC-C . . . . .
Hi\_KpsC-C . . . . .
Cj\_KpsC-C . . . . .
Ec\_KpsS . . . . .
Cs\_KpsS . . . . .
Nm\_KpsS . . . . .
Hi\_KpsS . . . . .
Cj\_KpsS . . . . .
